# Supplementary material for: HNF4α is a novel regulator of intestinal glucose-dependent insulinotropic polypeptide
Source: PubMed Central journal article supplement (PMC6414548; doi:10.1038/s41598-019-41061-z), 2019-03-12
Supplement: 41598_2019_41061_MOESM1_ESM.pdf [file 41598_2019_41061_MOESM1_ESM.pdf]

## HNF4 $\alpha$ is a novel regulator of intestinal glucose-dependent insulinotropic polypeptide

Romain Girard<sup>1</sup>, Mathieu Darsigny<sup>1</sup>, Christine Jones<sup>1</sup>, Faïza Maloum-Rami<sup>1</sup>, Yves G elinas<sup>2</sup>, Andr e C. Carpentier<sup>3</sup>, Mathieu Laplante<sup>2</sup>, Nathalie Perreault<sup>1</sup>, Fran ois Boudreau<sup>1\*</sup>

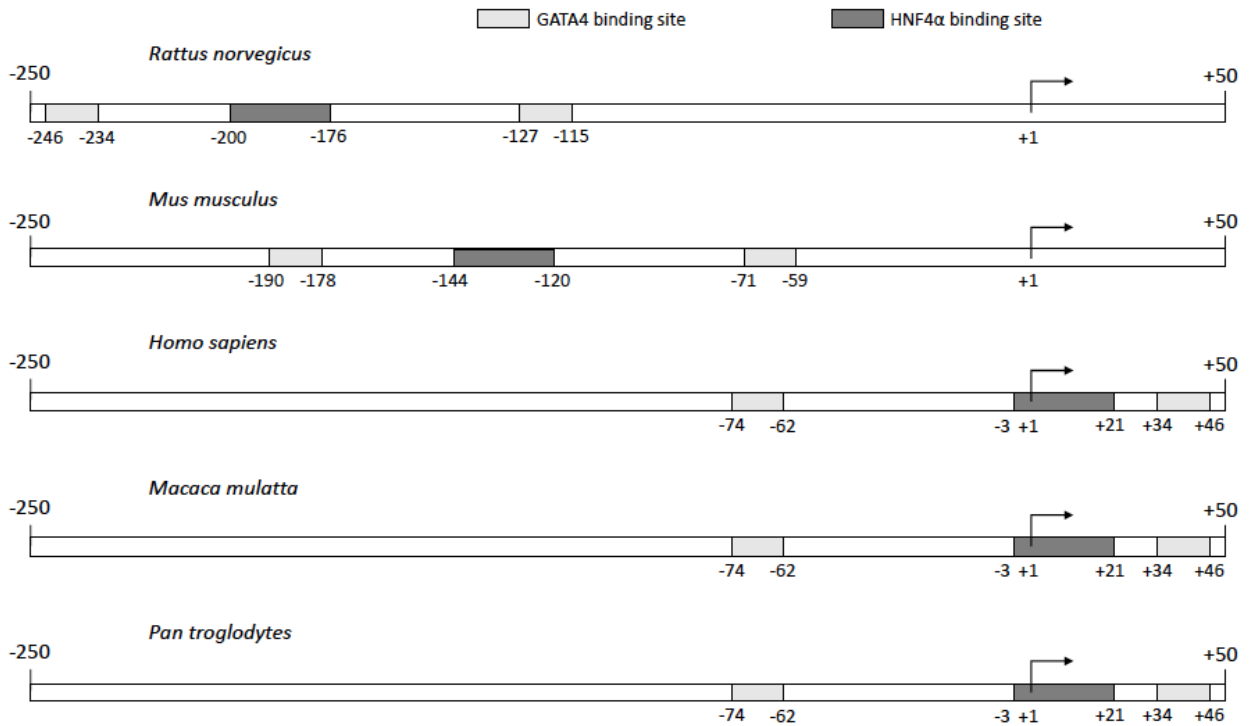

Supplementary Figure 1. Promoter analysis of GIP among several species with the use of the MatInspector software tool, <http://www.genomatix.de>.

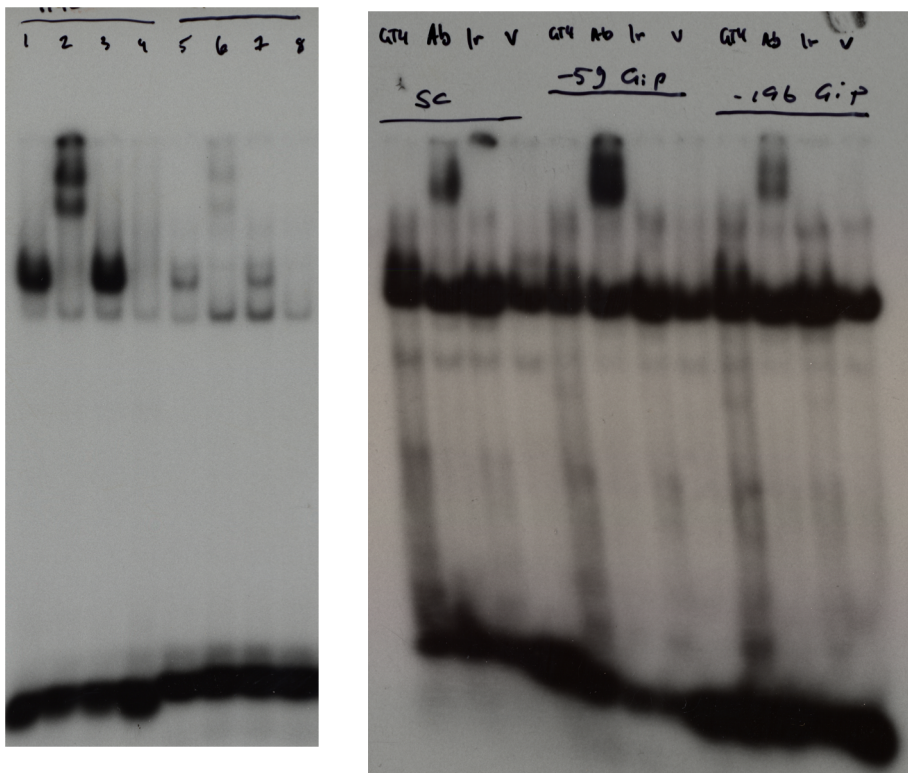

Supplementary Figure 2. Full length gels of EMSA for HNF4alpha interaction with DNA (left panel) and for GATA4 interaction with DNA (right panel).
